# Supplementary material for: Highly efficient removal of trace level dieldrin from water resources utilizing a cerasomal strategy
Source: Royal Society of Chemistry journal article supplement (doi:10.1039/c6ta00969g), 2016-01-01
Supplement: c6ta00969g1.pdf [file c6ta00969g1.pdf]

## Supporting Information

# Highly efficient removal of trace level dieldrin from water resource utilizing a cerasomal strategy

Shanshan Feng,<sup>a</sup> Fang Ma,<sup>a</sup> Renfa Liu,<sup>b</sup> Shouzhu Li,<sup>a</sup> Xiaoda Li,<sup>a</sup> Yushen Jin,<sup>a</sup>

Guanglei Fu,<sup>a</sup> Xiuli Yue<sup>a\*</sup>

<sup>a</sup>State Key Laboratory of Urban Water Resources and Environment, School of Municipal and Environmental Engineering, Harbin Institute of Technology, Harbin, 150001, People's Republic of China

<sup>b</sup>Department of Biomedical Engineering, College of Engineering, Peking University, Beijing 100871, People's Republic of China

---

\* To whom correspondence should be addressed. E-mail: xiulidx@163.com (X. Yue)

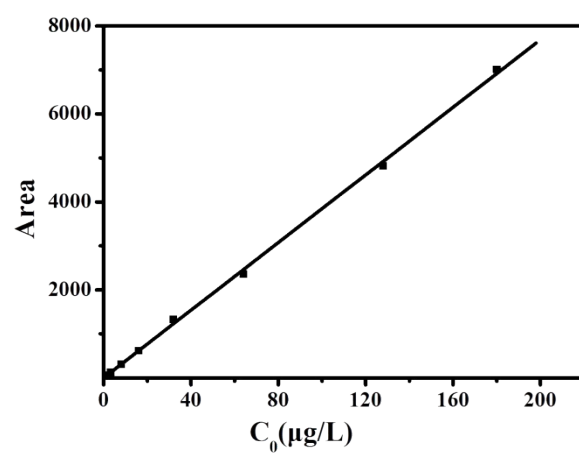

**Figure S1.** The standard curve of dieldrin concentration.

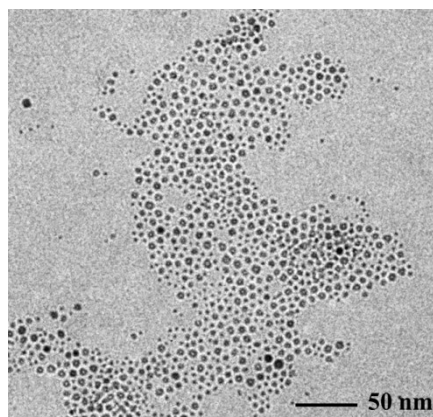

**Figure S2.** TEM image of Fe<sub>3</sub>O<sub>4</sub> NPs;

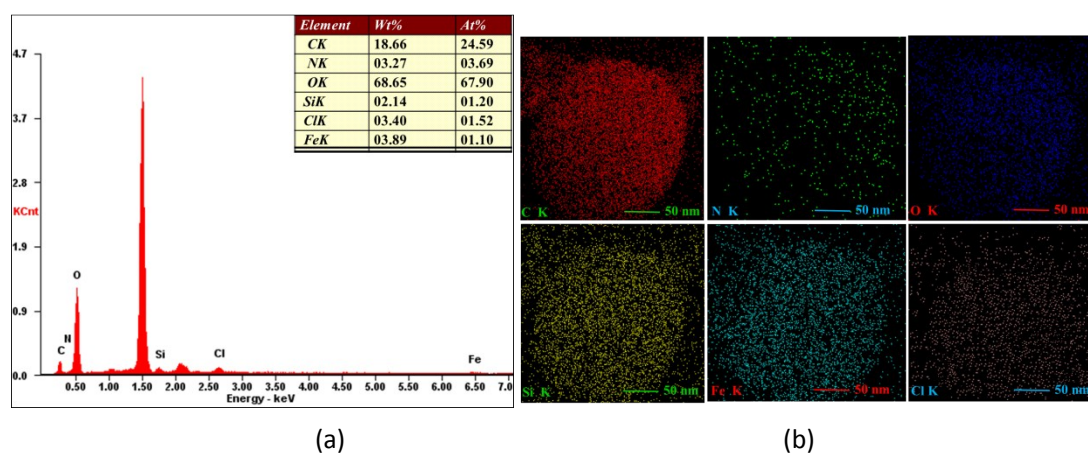

**Figure S3.** The images of EDAX (a) and SEM element mapping (b) of the magnetic cerasome capturing.

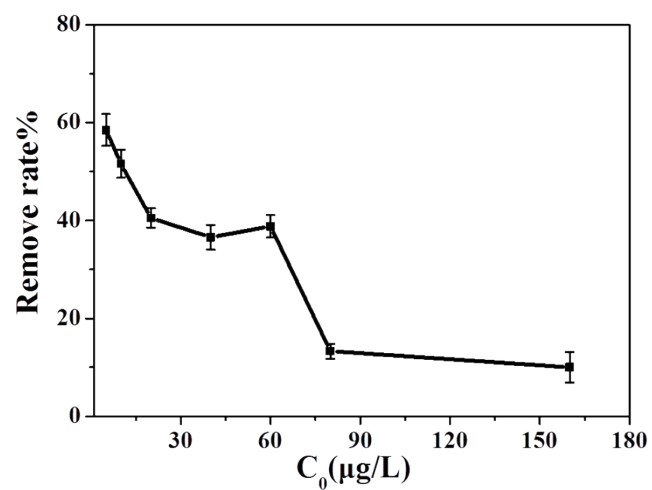

**Figure S4.** The effect of magnetic particles as a removal ( $C_0$  : 5.0  $\mu\text{g/L}$ , 10  $\mu\text{g/L}$ , 20  $\mu\text{g/L}$ , 40  $\mu\text{g/L}$ , 60  $\mu\text{g/L}$ , 80  $\mu\text{g/L}$ , 160  $\mu\text{g/L}$ ; pH=7;  $m = 0.5$  mg;  $V = 5$  ml);
